# Supplementary material
Source: PubMed Central journal article supplement (PMC9088287)
Supplement: aem.00239-22-s0001.pdf [file aem.00239-22-s0001.pdf]

## Supplemented figure S1

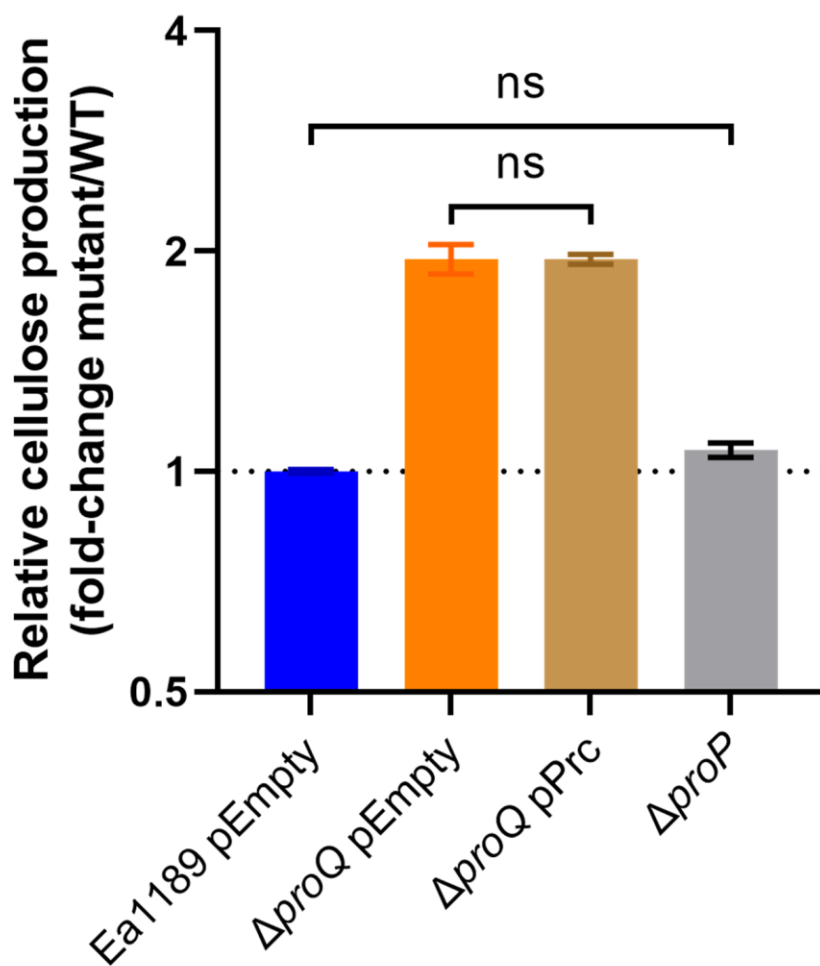

**Fig. S1.** Prc and ProP are likely not involved in cellulose production in *Erwinia amylovora*. Cellulose production was determined in wild-type Ea1189 harboring the empty vector pBBR1-MCS5, Ea1189ΔproQ harboring pBBR1-MCS5, Ea1189ΔproQ harboring pBBR1-MCS5-prc, and Ea1189ΔproP. Three independent experiments with three replicates were performed. One representative experiment was chosen. Error bars indicate standard errors of the means. ns (not significant),  $P > 0.05$  by Student's t-test.

## Supplemented figure S2

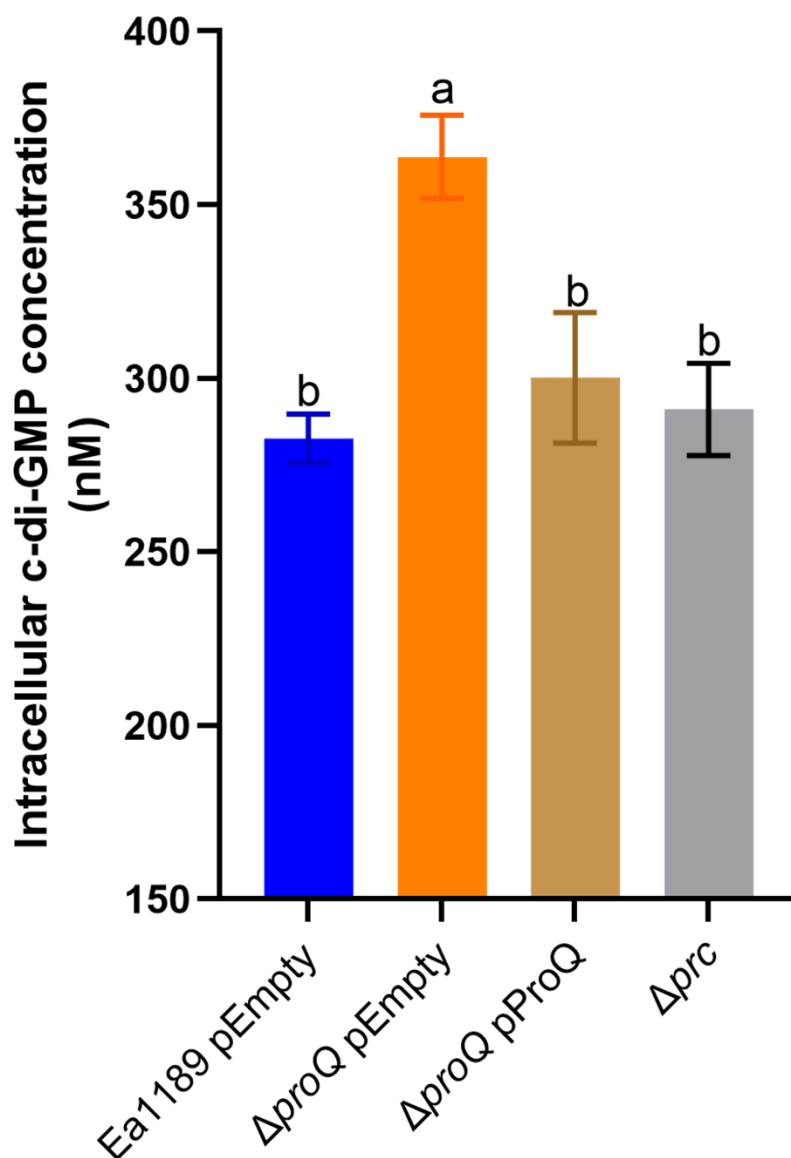

**Fig. S2.** ProQ represses intracellular c-di-GMP levels in *Erwinia amylovora*. Intracellular levels of c-di-GMP were measured in wild-type Ea1189 harboring the empty vector pCL1920, Ea1189Δ*proQ* harboring pCL1920, Ea1189Δ*proQ* harboring pCL1920-*proQ*, and Ea1189Δ*prc*. One representative experiment was chosen, and two independent experiments with three replicates were performed. Error bars indicate standard errors of the means. Different lowercase letters above the bars indicate statistically significant differences between treatments (Fisher's least significant difference,  $P < 0.05$ ).

## Supplemented Table S1

**Table S1.** Detailed information for transposon mutants.

| <b>transposon mutant names</b> | <b>insertion sites relative to gene 5' to 3'</b> | <b>gene name (ID)</b>      | <b>gene encoding protein function</b>              |
|--------------------------------|--------------------------------------------------|----------------------------|----------------------------------------------------|
| pQ2-4                          | 1285 bp                                          | <i>bcsA</i><br>(EAM_3387)  | cellulose synthase catalytic subunit [UDP-forming] |
| pQ17-2                         | 171 bp                                           | <i>bcsA</i>                | cellulose synthase catalytic subunit [UDP-forming] |
| pQ20-2                         | 1850 bp                                          | <i>bcsA</i>                | cellulose synthase catalytic subunit [UDP-forming] |
| pQ32-1                         | 1254 bp                                          | <i>bcsA</i>                | cellulose synthase catalytic subunit [UDP-forming] |
| pQ64-2                         | 119 bp                                           | <i>bcsA</i>                | cellulose synthase catalytic subunit [UDP-forming] |
| pQ66-2                         | 2100 bp                                          | <i>bcsA</i>                | cellulose synthase catalytic subunit [UDP-forming] |
| pQ69-2                         | 1771 bp                                          | <i>bcsA</i>                | cellulose synthase catalytic subunit [UDP-forming] |
| pQ71-2                         | 797 bp                                           | <i>bcsA</i>                | cellulose synthase catalytic subunit [UDP-forming] |
| pQ6-3                          | 1016 bp                                          | <i>bcsB</i><br>(EAM_3386)  | putative cellulose synthase protein                |
| pQ11-2                         | 808 bp                                           | <i>bcsB</i>                | putative cellulose synthase protein                |
| pQ12-2                         | 495 bp                                           | <i>bcsB</i>                | putative cellulose synthase protein                |
| pQ15-2                         | 1047 bp                                          | <i>bcsB</i>                | putative cellulose synthase protein                |
| pQ18-1                         | 2019 bp                                          | <i>bcsB</i>                | putative cellulose synthase protein                |
| pQ29-2                         | 1858 bp                                          | <i>bcsB</i>                | putative cellulose synthase protein                |
| pQ30-1                         | 1978 bp                                          | <i>bcsB</i>                | putative cellulose synthase protein                |
| pQ13-1                         | 2589 bp                                          | <i>bcsC</i><br>(EAM_3385)  | putative cellulose synthase protein                |
| pQ21-1                         | 2004 bp                                          | <i>bcsC</i>                | putative cellulose synthase protein                |
| pQ24-1                         | 3569 bp                                          | <i>bcsC</i>                | putative cellulose synthase protein                |
| pQ26-1                         | 3992 bp                                          | <i>bcsC</i>                | putative cellulose synthase protein                |
| pQ54-1                         | 40 bp                                            | <i>bcsE</i><br>(EAM_3382)  | conserved hypothetical protein                     |
| pQ48-2                         | 333 bp                                           | <i>bcsQ</i><br>(EAM_3388)  | putative cellulose biosynthesis protein            |
| pQ49-2                         | 400 bp                                           | <i>bcsQ</i>                | putative cellulose biosynthesis protein            |
| pQ47-2                         | 103 bp                                           | <i>clpX1</i><br>(EAM_0991) | ATP-dependent Clp protease ATP-binding subunit     |
| pQ55-2                         | 108 bp                                           | <i>clpX1</i>               | ATP-dependent Clp protease ATP-binding subunit     |
| pQ7-2                          | 153 bp                                           | <i>csrA</i><br>(EAM_2637)  | carbon storage regulator                           |
| pq14-2                         | 573 bp                                           | <i>edcB</i><br>(EAM_0564)  | putative signal transduction protein               |
| pQ19-1                         | 52 bp                                            | <i>edcB</i>                | putative signal transduction protein               |
| pQ22-1                         | 374 bp                                           | <i>edcB</i>                | putative signal transduction protein               |
| pQ43-1                         | 439 bp                                           | <i>edcB</i>                | putative signal transduction protein               |

|        |         |                           |                                                                                                                        |
|--------|---------|---------------------------|------------------------------------------------------------------------------------------------------------------------|
| pQ53-1 | 1097 bp | <i>fliC</i><br>(EAM_2562) | flagellin                                                                                                              |
| pQ65-2 | 255 bp  | <i>gmhA</i><br>(EAM_0891) | phosphoheptose isomerase (D-sedoheptulose 7-phosphate isomerase)                                                       |
| pQ39-2 | 1178 bp | <i>hldE</i><br>(EAM_2994) | bifunctional protein [includes: D-beta-D-heptose 7-phosphate kinase; D-beta-D-heptose 1-phosphate adenosyltransferase] |
| pQ40-1 | 272 bp  | <i>hldE</i>               | bifunctional protein [includes: D-beta-D-heptose 7-phosphate kinase; D-beta-D-heptose 1-phosphate adenosyltransferase] |
| pQ58-2 | 502 bp  | <i>ispZ</i><br>(EAM_1886) | putative intracellular septation protein                                                                               |
| pQ4-2  | 1592 bp | <i>lon</i><br>(EAM_0994)  | ATP-dependent protease La                                                                                              |
| pQ5-1  | 230 bp  | <i>lon</i>                | ATP-dependent protease La                                                                                              |
| pQ8-2  | 2324 bp | <i>lon</i>                | ATP-dependent protease La                                                                                              |
| pQ9-2  | 1192 bp | <i>lon</i>                | ATP-dependent protease La                                                                                              |
| pQ45-1 | 1 bp    | <i>lrhA</i><br>(EAM_2993) | NADH dehydrogenase operon transcriptional regulator (LysR-family transcriptional regulator)                            |
| pQ51-1 | 2508 bp | <i>mdoH</i><br>(EAM_1418) | glucans biosynthesis glucosyl transferase H                                                                            |
| pQ70-2 | 1 bp    | <i>mdtA</i><br>(EAM_2183) | multidrug resistance protein                                                                                           |
| pQ68-2 | 169 bp  | <i>murQ</i><br>(EAM_2506) | putative phosphosugar-binding protein                                                                                  |
| pQ27-1 | 224 bp  | <i>nth</i><br>(EAM_1688)  | endonuclease III                                                                                                       |
| pQ42-2 | 42 bp   | <i>rfaC</i><br>(EAM_0088) | lipopolysaccharide heptosyltransferase-1                                                                               |
| pQ62-2 | 487 bp  | <i>rfaC</i>               | lipopolysaccharide heptosyltransferase-1                                                                               |
| pQ1    | 141 bp  | <i>waaE</i><br>(EAM_0077) | lipopolysaccharide core biosynthesis glycosyl transferase                                                              |
| pQ36-1 | 300 bp  | <i>waaE</i>               | lipopolysaccharide core biosynthesis glycosyl transferase                                                              |
| pQ57-2 | 536 bp  | <i>walW</i><br>(EAM_0080) | glycosyl transferase                                                                                                   |
| pQ63-2 | 923 bp  | <i>wbnF</i><br>(EAM_1916) | putative uridine diphosphate galacturonate 4-epimerase (nucleotide sugar epimerase)                                    |
| pQ50-2 | 496 bp  | <i>wzyE</i><br>(EAM_0174) | putative ECA polymerase                                                                                                |
